# Supplementary material
Source: PubMed Central journal article supplement (PMC2738238)
Supplement: supp_83_18_9175__1.pdf [file supp_83_18_9175__1.pdf]

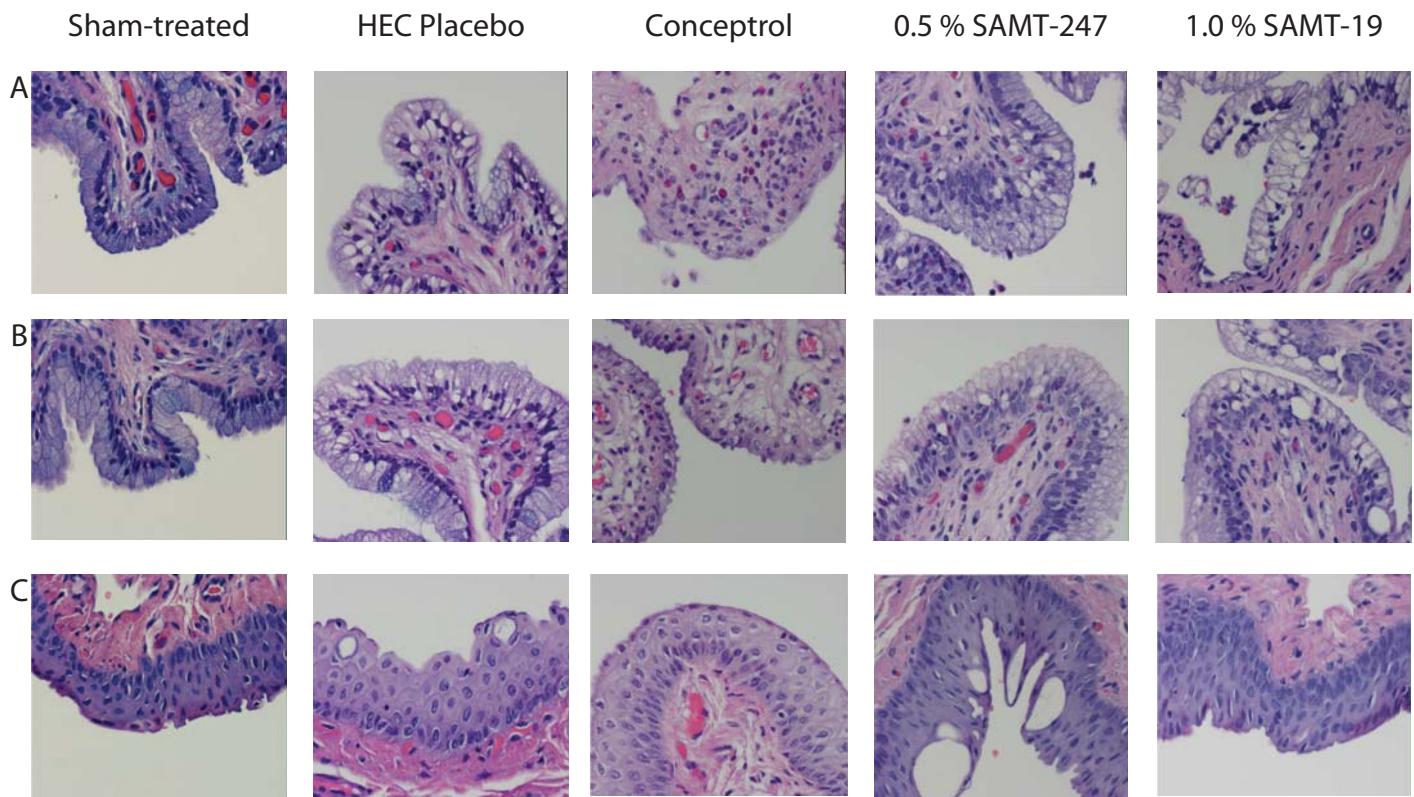

Supplemental Figure 1. Representative photographs of cranial (A), medial (B), and caudal (C) vaginal tissue of rabbits treated as stated to assess irritation caused by SAMT compounds. Rabbits (n=5) were dosed intravaginally daily over 10 days with 1 ml of HEC gel, then sacrificed for evaluation. Conceptrol was used as a control. Photographs are shown at 40X magnification.
